# Supplementary material for: Human Colon Mucosal Biofilms and Murine Host Communicate via Altered mRNA and microRNA Expression during Cancer
Source: mSystems. 2020 Jan 14;5(1):e00451-19. doi: 10.1128/mSystems.00451-19 (PMC6967385; doi:10.1128/mSystems.00451-19)
Supplement: FIG S1 [file mSystems.00451-19-sf001.pdf]

B
