# Supplementary material for: Human Colon Mucosal Biofilms and Murine Host Communicate via Altered mRNA and microRNA Expression during Cancer
Source: PubMed Central journal article supplement (PMC6967385; doi:10.1128/msystems.00451-19), 2020-01-14

Figure S2

A

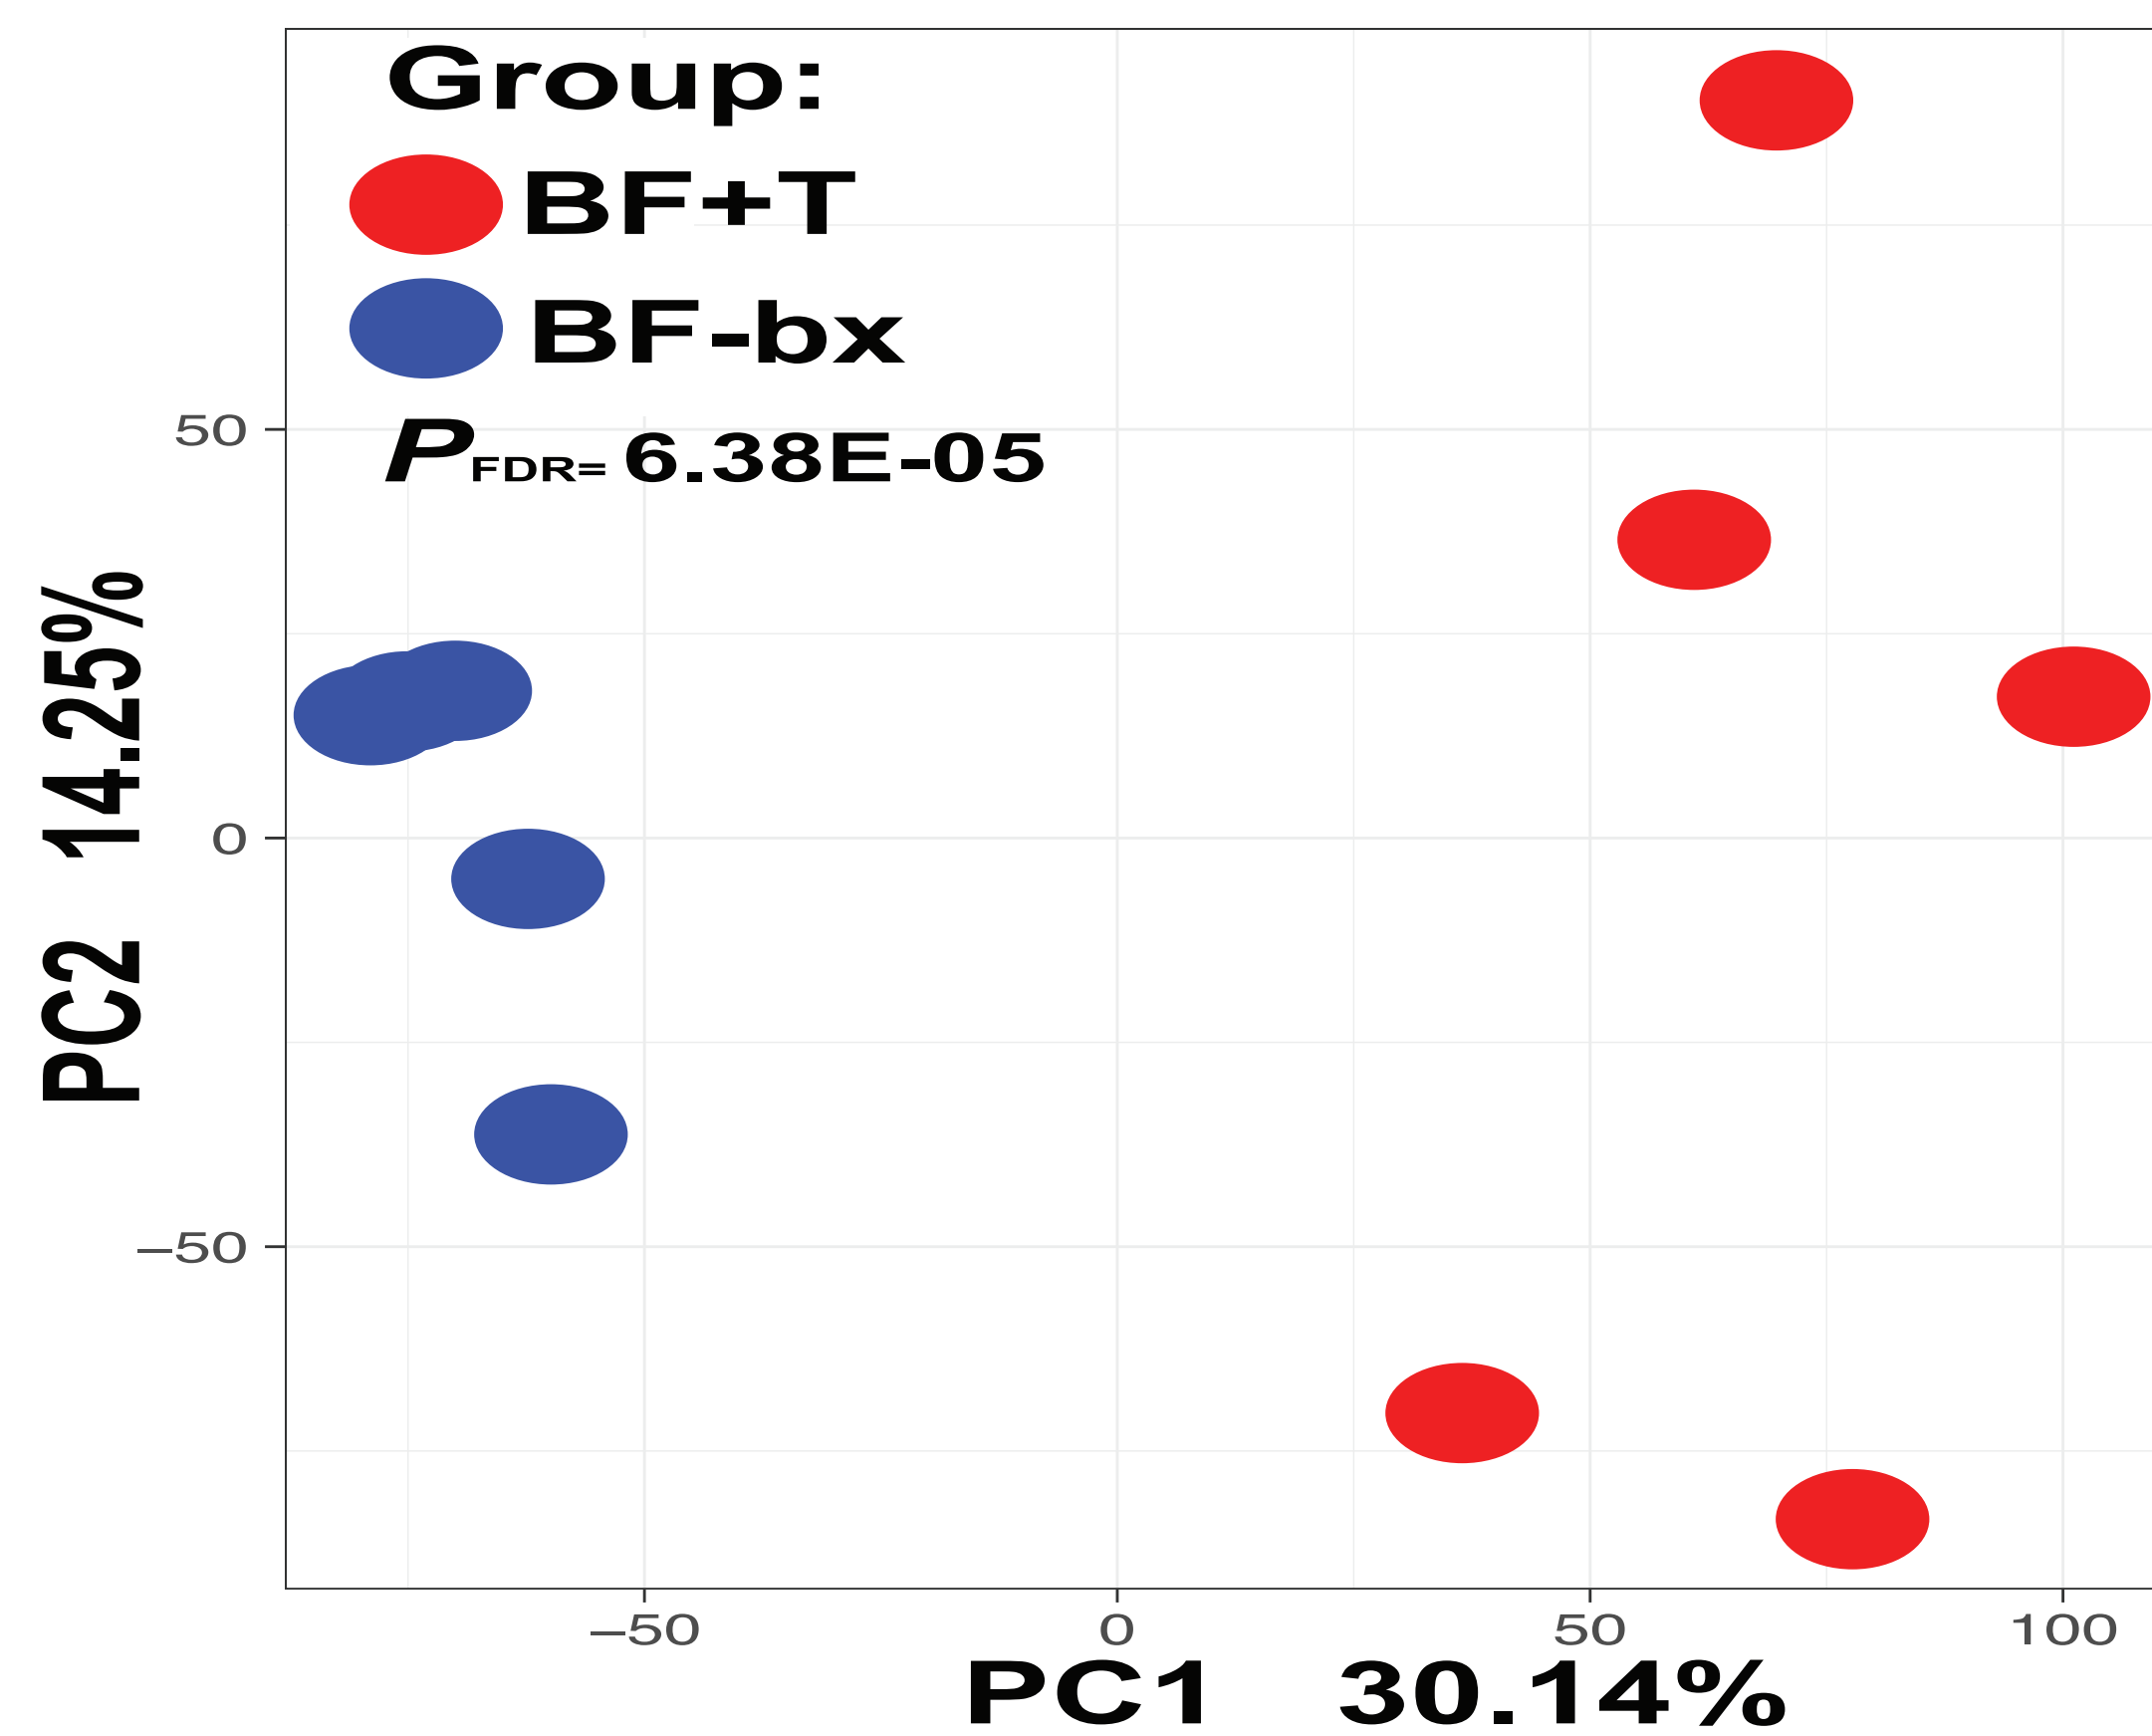

C

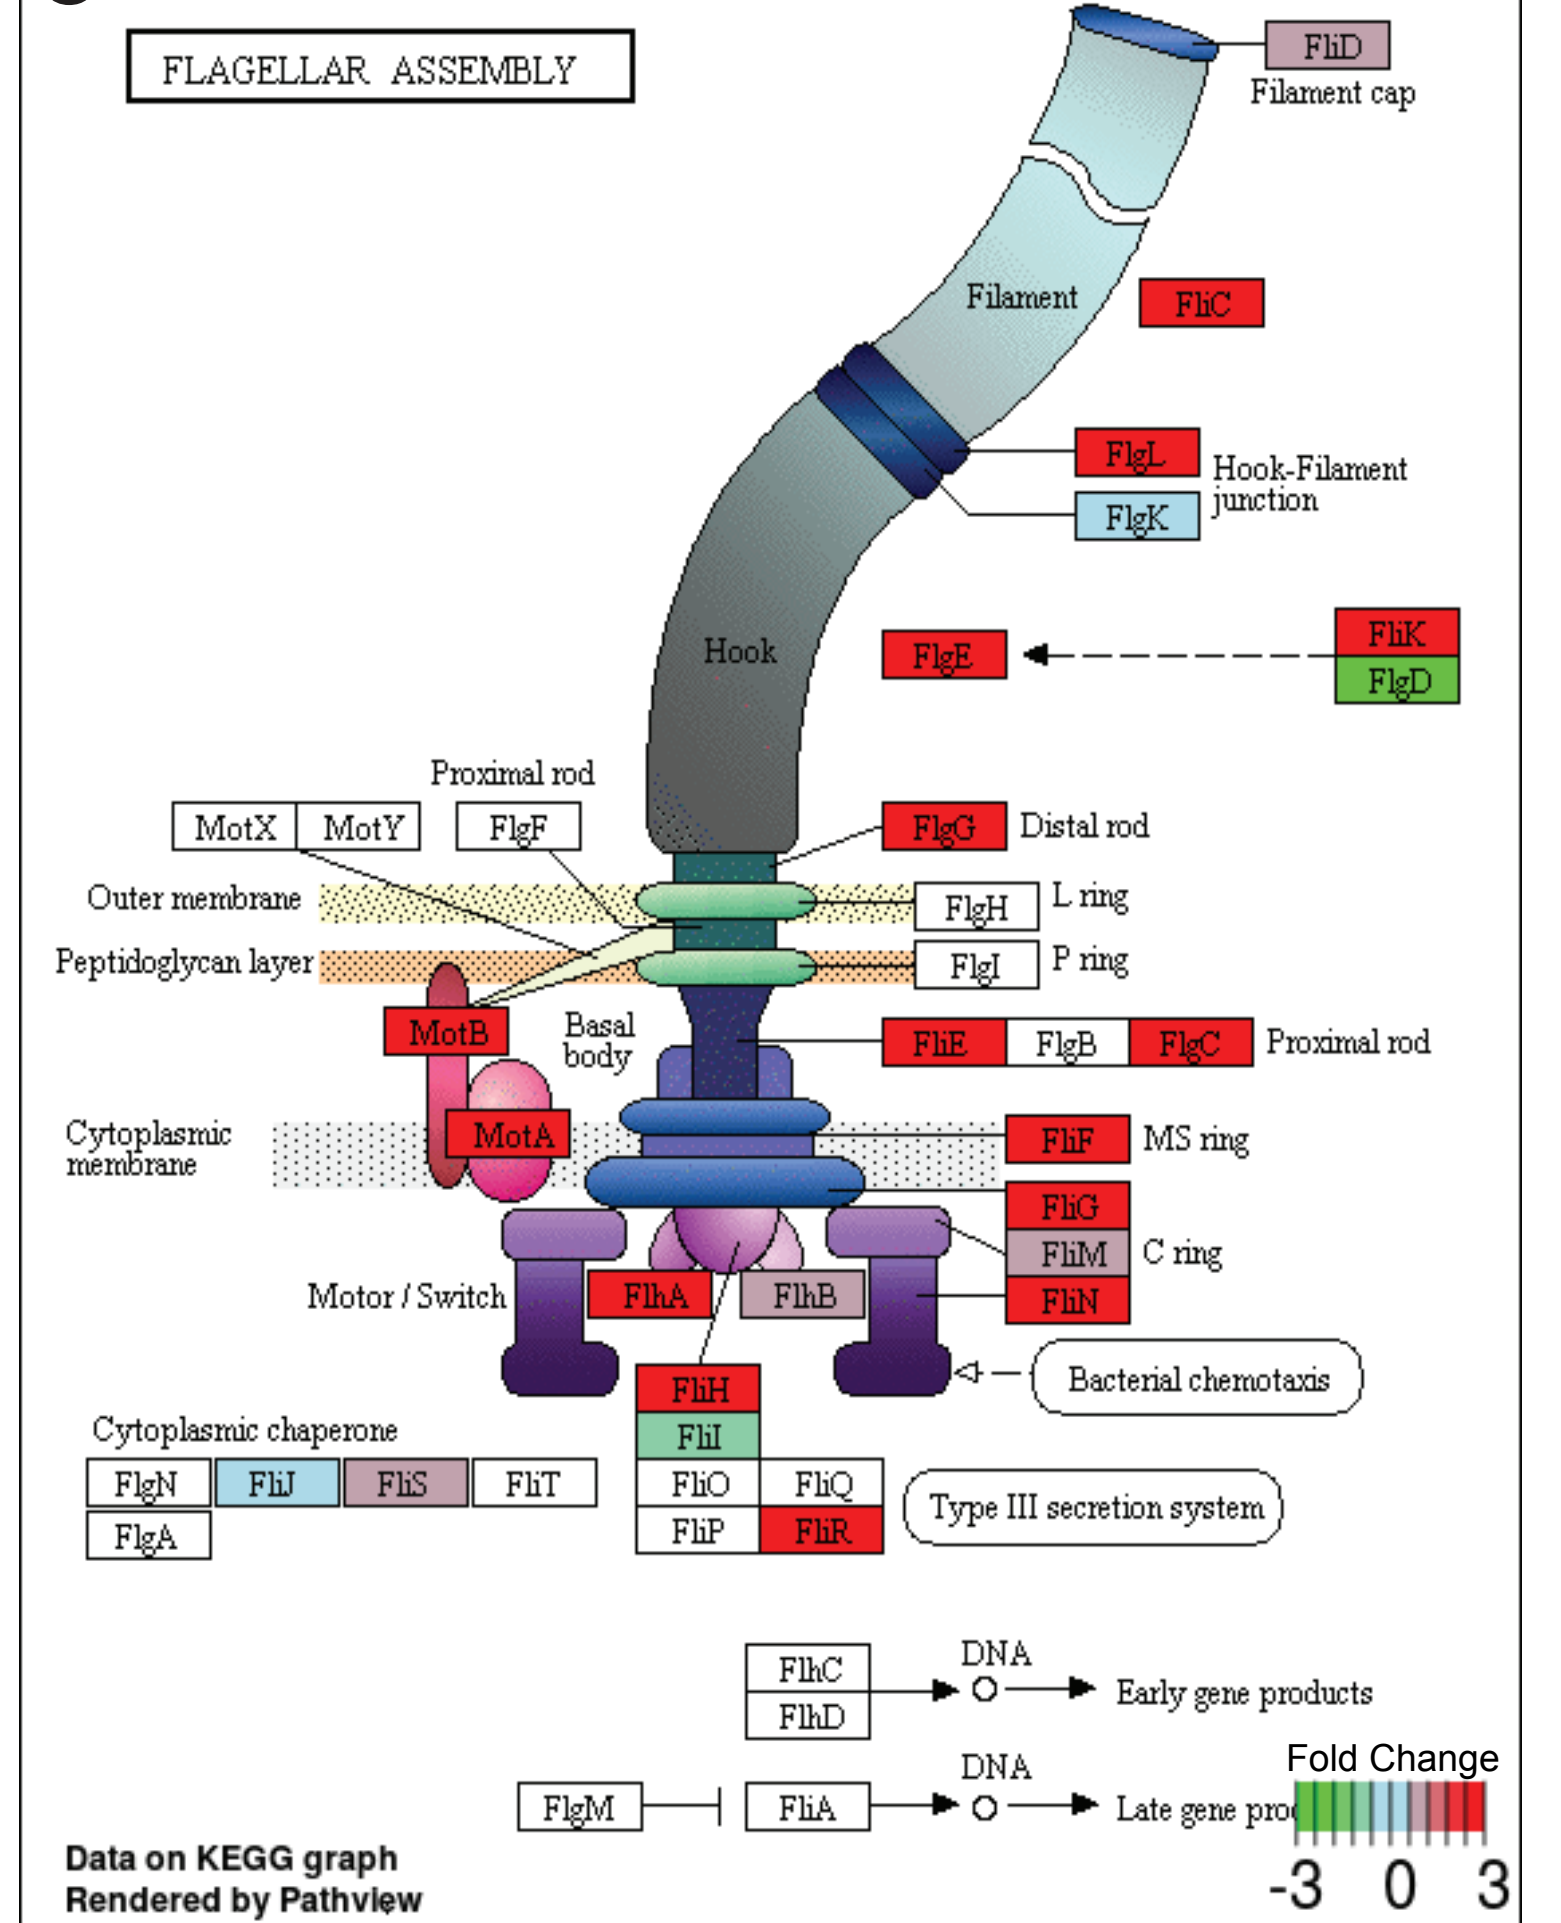

B

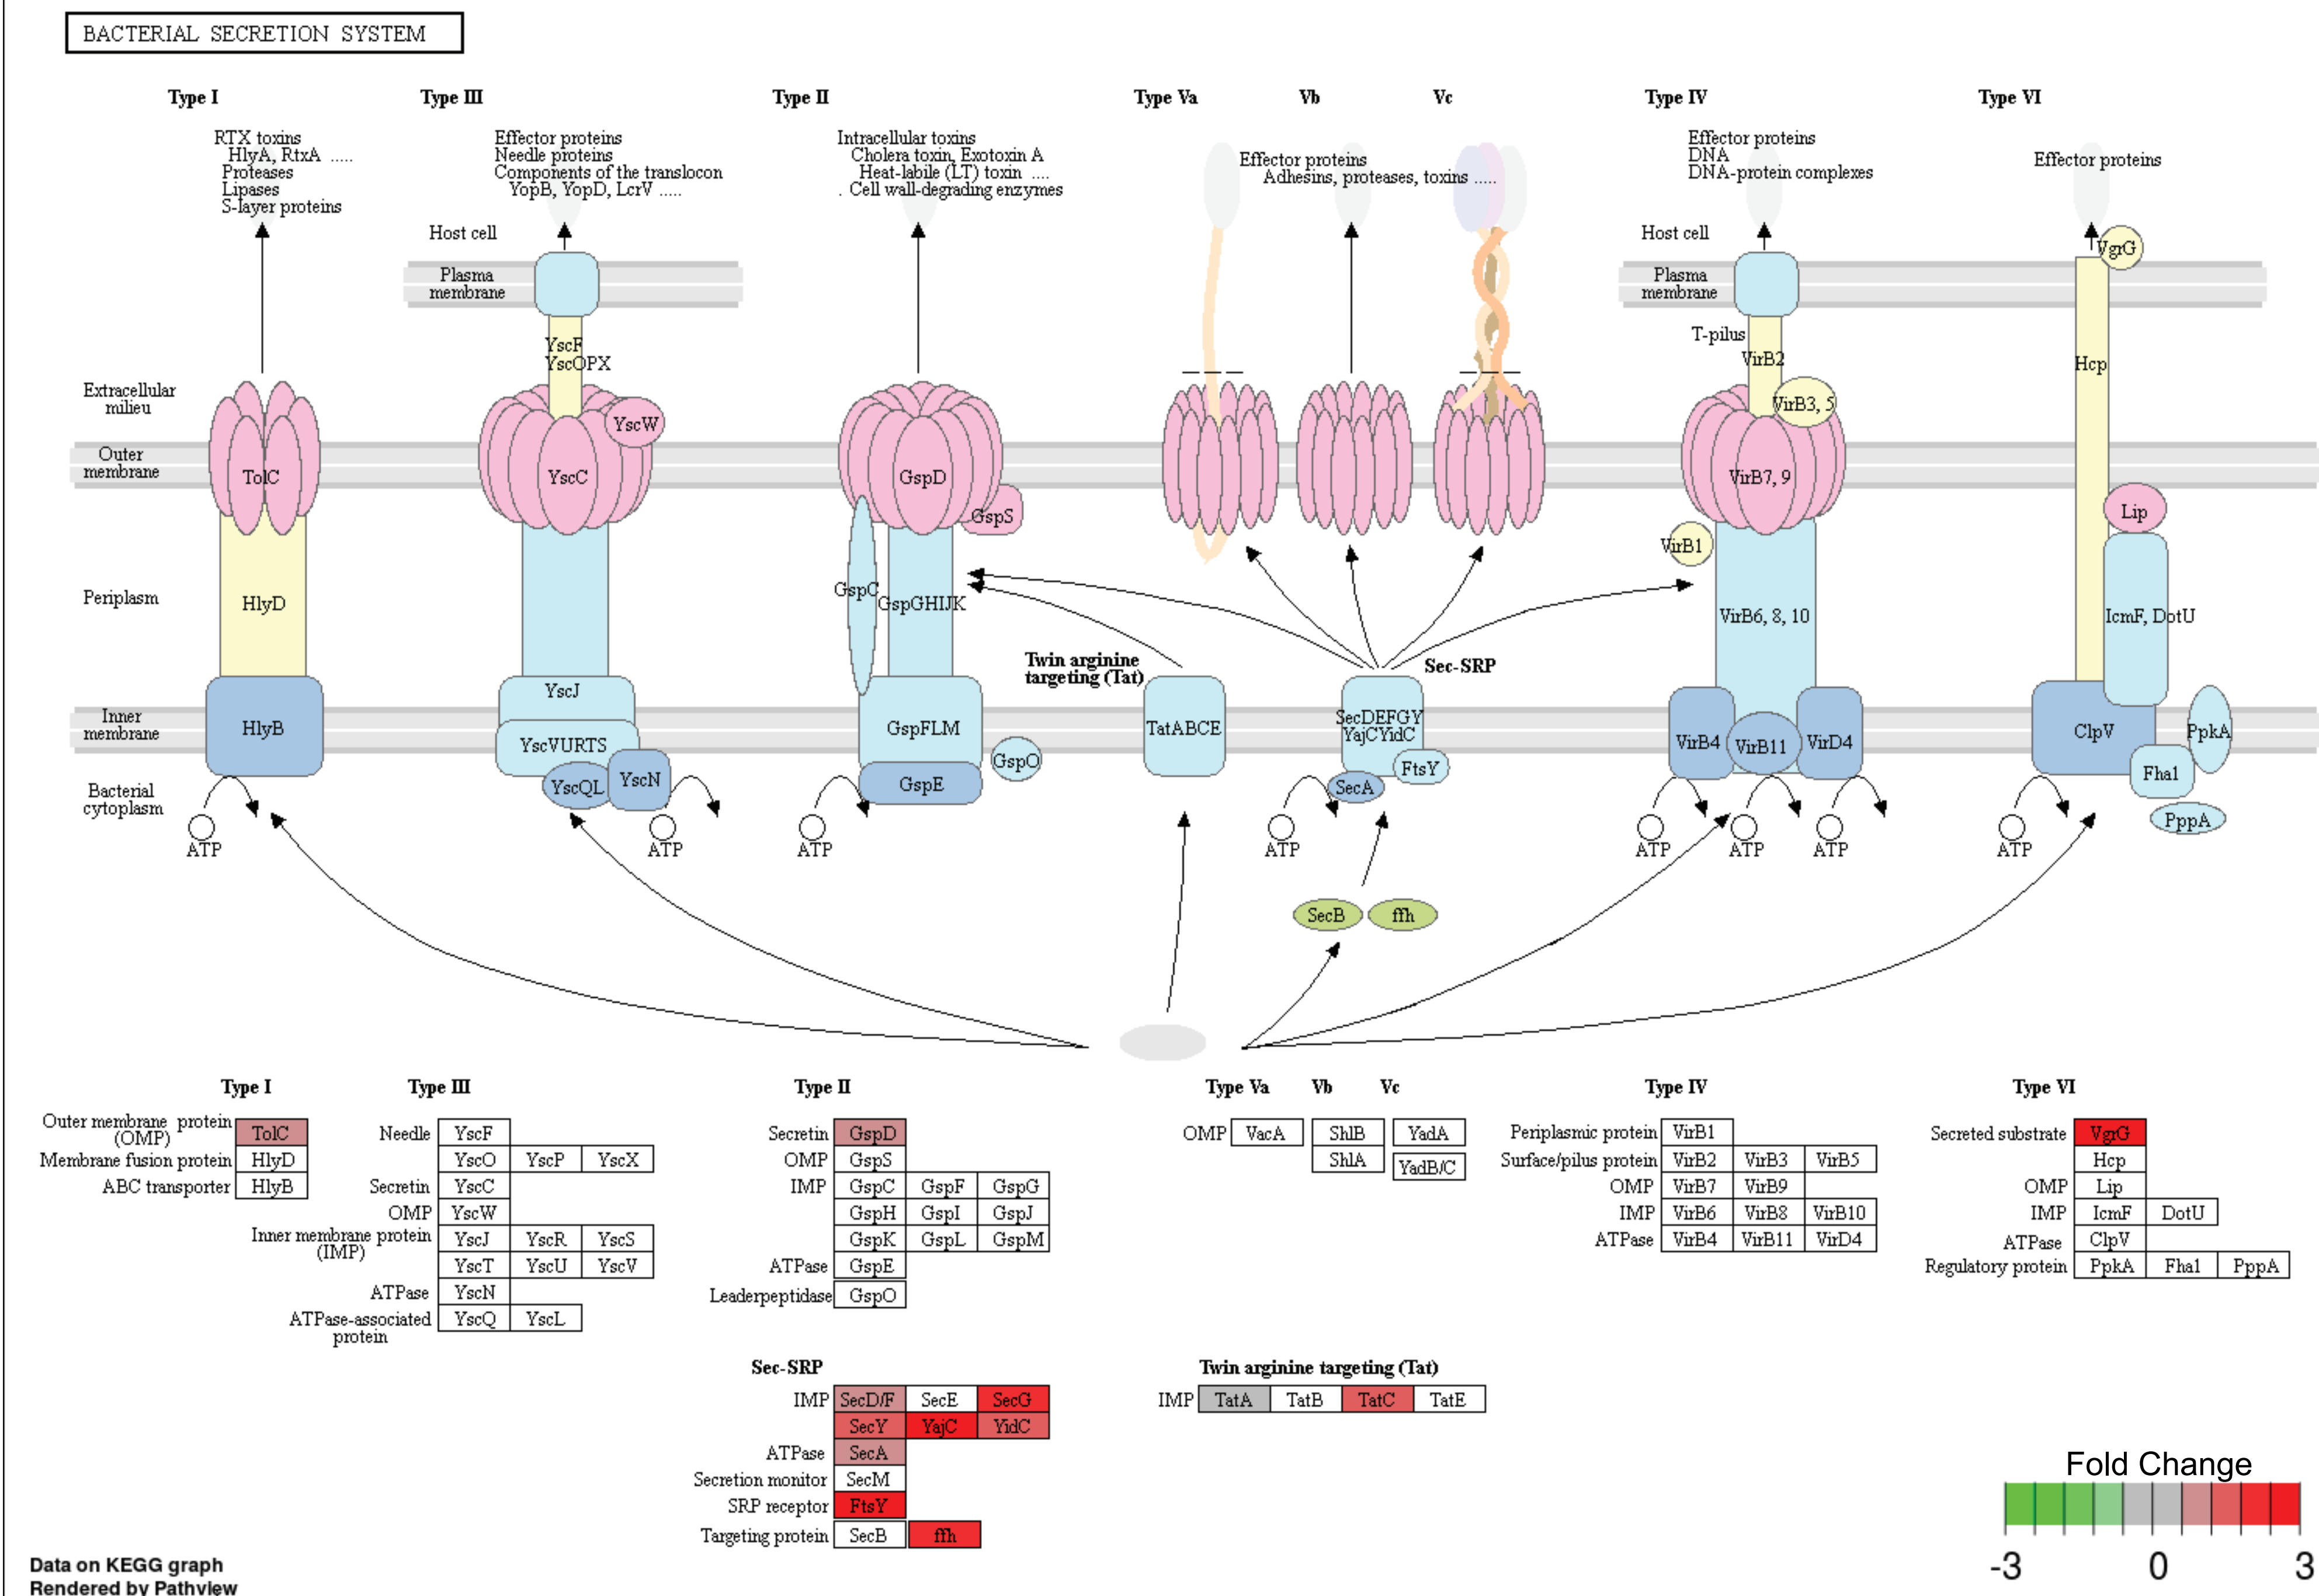

Supplement: mSystems.00451-19-sf002.pdf [file mSystems.00451-19-sf002.pdf]
