# Supplementary material for: Human Colon Mucosal Biofilms and Murine Host Communicate via Altered mRNA and microRNA Expression during Cancer
Source: PubMed Central journal article supplement (PMC6967385; doi:10.1128/msystems.00451-19), 2020-01-14

Figure S3

A

miRNA correlation with tumor number

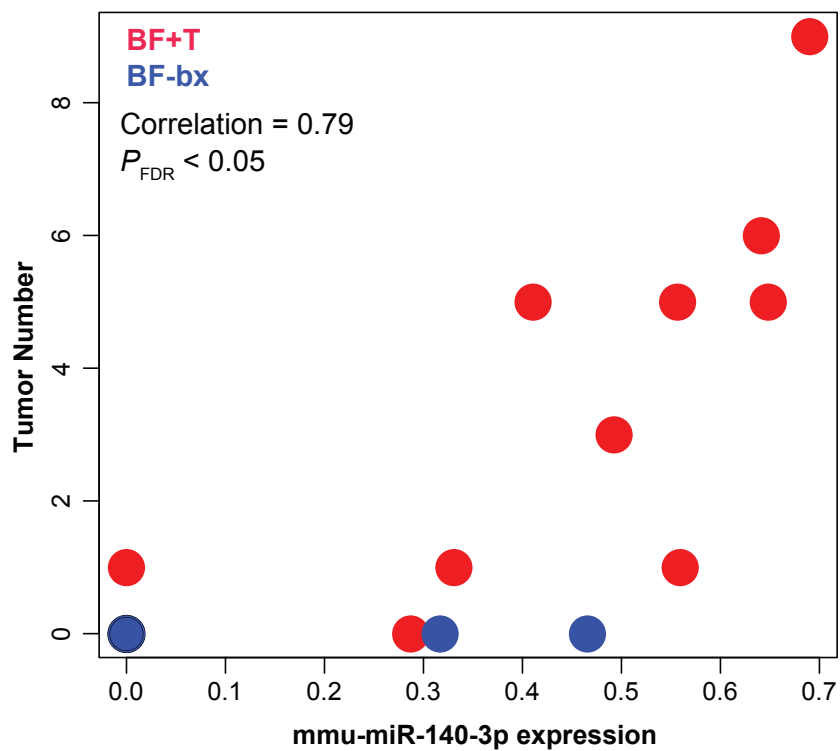100 randomly selected sets of miRNAs

B

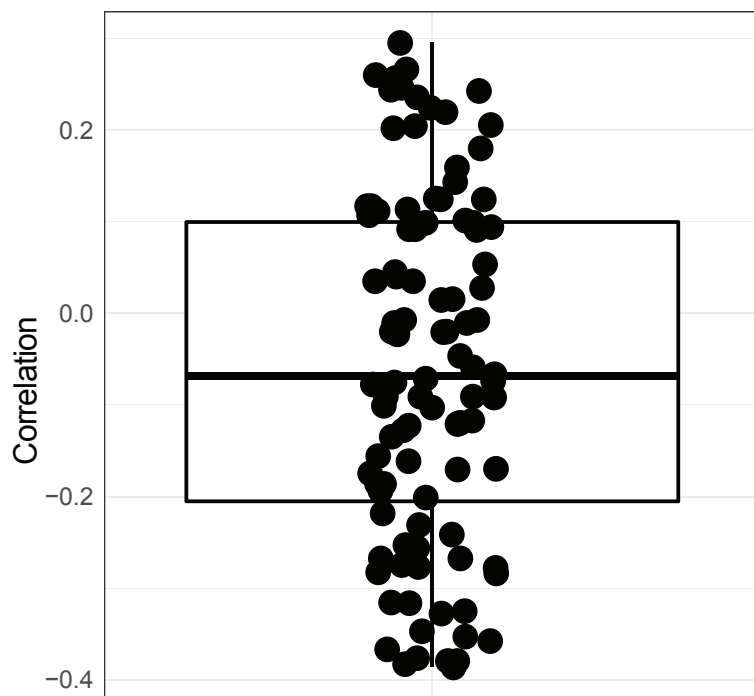

C

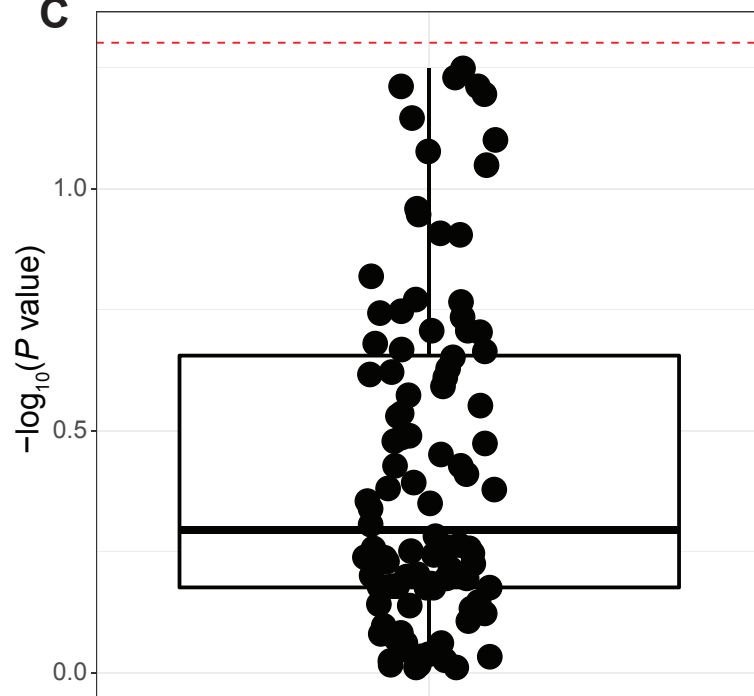

Supplement: mSystems.00451-19-sf003.pdf [file mSystems.00451-19-sf003.pdf]
