# Supplementary material for: Human Colon Mucosal Biofilms and Murine Host Communicate via Altered mRNA and microRNA Expression during Cancer
Source: PubMed Central journal article supplement (PMC6967385; doi:10.1128/msystems.00451-19), 2020-01-14

**Figure S4****BF-bx association vs reassociation****A**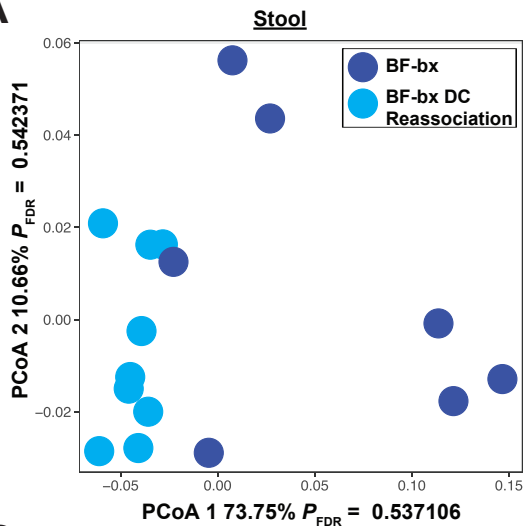**B**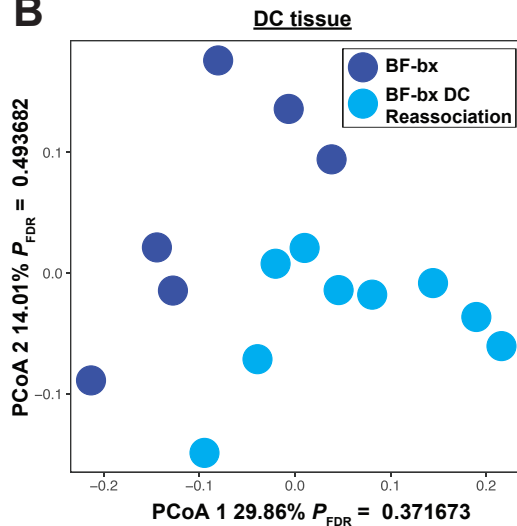**C**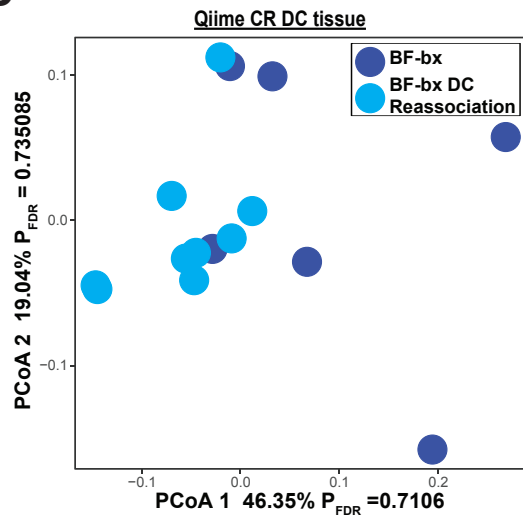

Supplement: mSystems.00451-19-sf004.pdf [file mSystems.00451-19-sf004.pdf]
