# Supplementary material for: Human Colon Mucosal Biofilms and Murine Host Communicate via Altered mRNA and microRNA Expression during Cancer
Source: PubMed Central journal article supplement (PMC6967385; doi:10.1128/msystems.00451-19), 2020-01-14

**Figure S6**

**A**

**BF+T reassociation comparison**

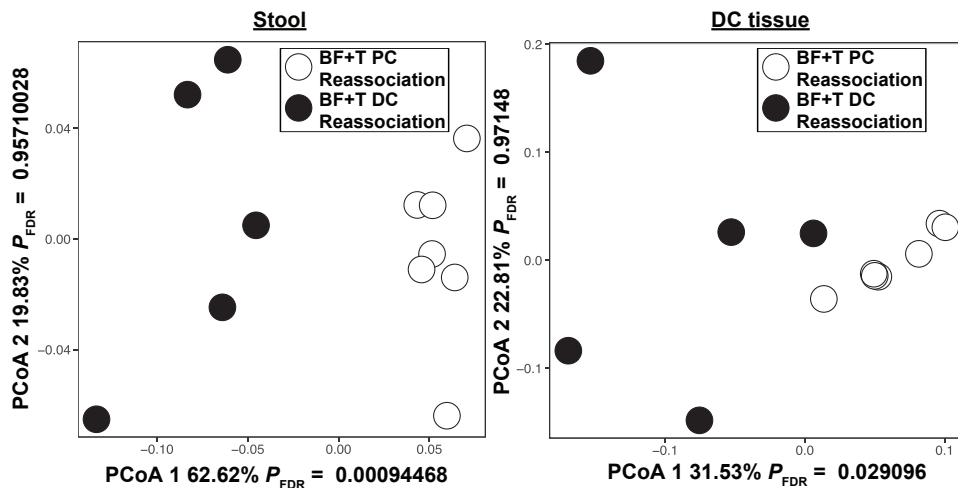

**B**

**Significantly different genera**

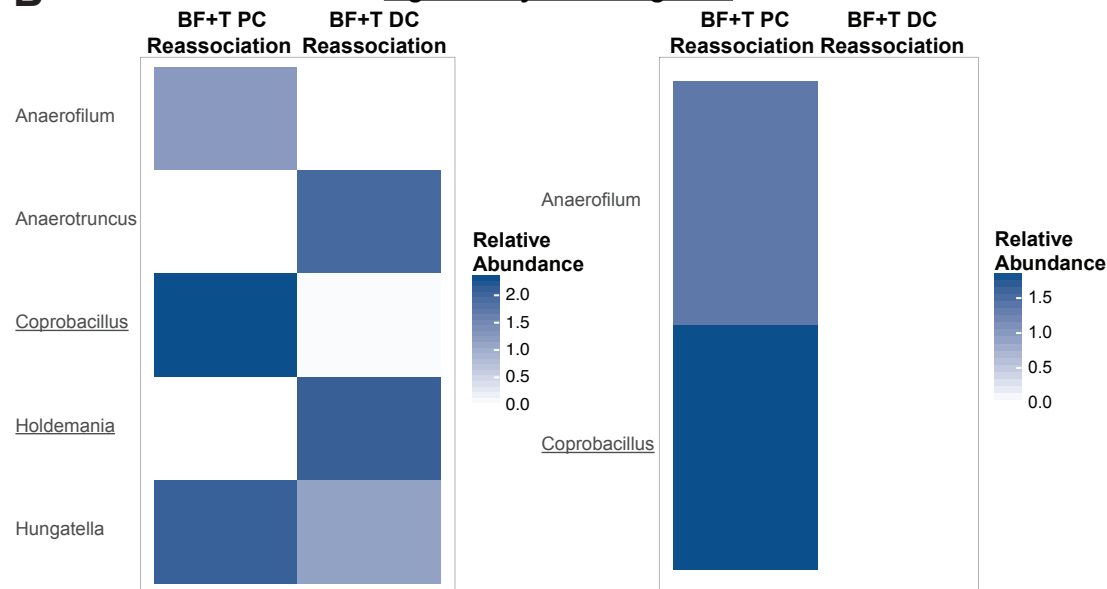

Supplement: mSystems.00451-19-sf006.pdf [file mSystems.00451-19-sf006.pdf]
